# Supplementary material for: Piezo-/photo catalysis of the PZT/Ag2O heterostructure for dye decomposition under visible light and ultrasonic vibration
Source: Royal Society of Chemistry journal article supplement (doi:10.1039/d3nj02706f), 2023-01-01
Supplement: d3nj02706f1.pdf [file d3nj02706f1.pdf]

### Supporting Information

Tab. S1 Degradation rates of PZT and PZT/Ag<sub>2</sub>O to RhB under different conditions

Tab. S2 k values for RhB degradation kinetics under different conditions

Tab. S3 Degradation rate of RhB in PZT/Ag<sub>2</sub>O piezo-/photocatalysis at different cycle degradation times

Tab. S1 Degradation rates of PZT and PZT/Ag<sub>2</sub>O to RhB under different conditions

| Conditions           | PZT+L | PZT+UI | PZT+L+UI | PZT/Ag <sub>2</sub> O+ UI | PZT/Ag <sub>2</sub> O+ L | PZT/Ag <sub>2</sub> O+L+UI |
|----------------------|-------|--------|----------|---------------------------|--------------------------|----------------------------|
| Degradation rate (%) | 14.74 | 36.54  | 46.05    | 55.98                     | 65.14                    | 96.31                      |

Tab. S2 k values for RhB degradation kinetics under different conditions

| Conditions | PZT+L  | PZT+UI | PZT+L+UI | PZT/Ag <sub>2</sub> O+UI | PZT/Ag <sub>2</sub> O+L | PZT/Ag <sub>2</sub> O+L+UI |
|------------|--------|--------|----------|--------------------------|-------------------------|----------------------------|
| K          | 0.0024 | 0.0075 | 0.0102   | 0.0135                   | 0.0177                  | 0.0530                     |

Tab. S3 Degradation rate of RhB in PZT/Ag<sub>2</sub>O piezo-/photocatalysis at different cycle degradation times

| Cycles times          | 1      | 2      | 3     | 4      | 5   |
|-----------------------|--------|--------|-------|--------|-----|
| PZT/Ag <sub>2</sub> O | 96.31% | 94.53% | 90.2% | 88.66% | 86% |
